# Supplementary material
Source: publisher site journal article supplement (https://www.degruyterbrill.com/publication/isbn/9783899495683/downloadAsset/9783899495683_Inhaltsverzeichnis.pdf)
Supplement: Supplementary file 1 [file 9783899495683_Inhaltsverzeichnis.pdf]

# Inhaltsverzeichnis

|                                                                        |           |
|------------------------------------------------------------------------|-----------|
| <b>1. Kapitel. Einleitung</b>                                          | <b>1</b>  |
| <b>§ 1. Praktische Bedeutung des Erbrechts</b>                         | <b>1</b>  |
| <b>§ 2. Erbschaftsteuerrecht</b>                                       | <b>3</b>  |
| <b>§ 3. Die geschichtliche Entwicklung des Erbrechts</b>               | <b>13</b> |
| A. Das germanische Recht                                               | 14        |
| B. Das römische Recht                                                  | 15        |
| C. Die Entstehungsgeschichte des 5. Buches im BGB                      | 16        |
| <b>§ 4. Erbrechtsreformen</b>                                          | <b>17</b> |
| A. Die Notwendigkeit von Erbrechtsreformen                             | 17        |
| B. Die wichtigsten Reformen seit Inkrafttreten des BGB                 | 18        |
| I. Testamentsgesetz (1938)                                             | 18        |
| II. Gleichberechtigungsgesetz (1957)                                   | 19        |
| III. Nichtehechengesetz (1969)                                         | 19        |
| IV. Erbrechtsgleichstellungsgesetz (1997)                              | 21        |
| V. Gesetz über die Anerkennung gleichgeschlechtlicher<br>Lebenspartner | 23        |
| C. Die Zukunft des Erbrechts                                           | 23        |
| <b>§ 5. Rechtsquellen</b>                                              | <b>25</b> |
| A. Verfassungsrecht                                                    | 25        |
| I. Institutsgarantie                                                   | 26        |
| II. Individualgrundrecht                                               | 27        |
| III. Grenze für den inhalts- und schrankenbestimmenden<br>Gesetzgeber  | 27        |
| B. Sonstige Rechtsquellen                                              | 28        |
| I. Vorschriften des BGB außerhalb des fünften Buches                   | 28        |
| II. Normen des HGB mit erbrechtlichem Regelungsinhalt                  | 30        |
| III. Die Anerbengesetze                                                | 30        |
| IV. Verfahrensgesetze mit erbrechtlichem Bezug                         | 31        |
| V. Die Vorschriften des EGBGB                                          | 32        |
|                                                                        | XI        |

|                                                                                               |           |
|-----------------------------------------------------------------------------------------------|-----------|
| <b>§ 6. Grundbegriffe und Grundprinzipien</b>                                                 | <b>33</b> |
| A. Grundbegriffe                                                                              | 33        |
| I. Erbfall und Erblasser                                                                      | 33        |
| II. Erbe und Erbfähigkeit                                                                     | 33        |
| III. Erbschaft und Nachlass                                                                   | 36        |
| B. Grundprinzipien                                                                            | 37        |
| <br>                                                                                          |           |
| <b>2. Kapitel. Gesetzliche Erbfolge</b>                                                       | <b>39</b> |
| <br>                                                                                          |           |
| <b>§ 1. Das Verwandtenerbrecht</b>                                                            | <b>39</b> |
| A. Grundlagen                                                                                 | 39        |
| I. Gesetzliche und gewillkürte Erbfolge                                                       | 39        |
| II. Grundgedanken der gesetzlichen Erbfolge                                                   | 40        |
| III. Anwendungsbereich im Rahmen der gewillkürten Erbfolge                                    | 41        |
| B. Die Verwandten als Erbberechtigte                                                          | 43        |
| I. Der Begriff der Verwandtschaft                                                             | 43        |
| II. Verwandtschaft kraft Abstammung                                                           | 43        |
| III. Verwandtschaft ohne Abstammung                                                           | 44        |
| C. Grundprinzipien                                                                            | 45        |
| I. Das Parentelsystem                                                                         | 45        |
| II. Die Erbfolge nach Stämmen (Stammes- und Linien-system)                                    | 48        |
| III. Das Gradsystem                                                                           | 52        |
| D. Beispiele zur Beerbung in der 1.–3. Ordnung                                                | 52        |
| I. Gesetzliche Erbfolge in der ersten Ordnung                                                 | 52        |
| II. Gesetzliche Erbfolge in der zweiten Ordnung                                               | 54        |
| III. Gesetzliche Erbfolge in der dritten Ordnung                                              | 55        |
| E. Sonderfall: Gesetzliches Erbrecht bei mehrfacher Verwandtschaft                            | 56        |
| <br>                                                                                          |           |
| <b>§ 2. Das gesetzliche Ehegattenerbrecht</b>                                                 | <b>57</b> |
| A. Allgemeine Voraussetzungen                                                                 | 57        |
| I. Bestehen der Ehe im Zeitpunkt des Erbfalls                                                 | 57        |
| II. Kein Ausschluss des Ehegattenerbrechts                                                    | 57        |
| B. Der Erbteil des Ehegatten nach § 1931 Abs. 1 u. 2 (ohne Berücksichtigung des Güterstandes) | 61        |
| I. Erbteil neben Verwandten der 1. Ordnung                                                    | 61        |

|                                                                                     |      |
|-------------------------------------------------------------------------------------|------|
| II. Erbteil neben Verwandten der 2. Ordnung                                         | 62   |
| III. Erbteil neben Verwandten der 3. Ordnung                                        | 62   |
| IV. Erbteil neben Verwandten entfernterer Ordnungen                                 | 63   |
| V. Erbrecht des verwandten Ehegatten                                                | 63   |
| VI. Nichteheliche Lebensgemeinschaft                                                | 64   |
| VII. Eingetragene Partnerschaft                                                     | 64   |
| VIII. Prüfungsreihenfolge                                                           | 65   |
| C. Umfang des Ehegattenerbrechts unter Berücksichtigung des jeweiligen Güterstandes | 65   |
| I. Einfluss der Zugewinnngemeinschaft auf das Ehegattenerbrecht                     | 65   |
| II. Einfluss der Gütertrennung auf das Ehegattenerbrecht                            | 68   |
| III. Einfluss der Gütergemeinschaft auf das Ehegattenerbrecht                       | 69   |
| D. Der Voraus des Ehegatten                                                         | 70   |
| E. Der Dreißigste                                                                   | 70   |
| F. Wiederholung und Vertiefung                                                      | 71   |
| <b>§ 3. Erbrecht des Staates</b>                                                    | 71   |
| A. Normzweck                                                                        | 71   |
| B. Voraussetzungen des Staatserbrechts                                              | 72   |
| C. Rechtsfolgen                                                                     | 73   |
| D. Verfahren                                                                        | 73   |
| <b>3. Kapitel. Die gewillkürte Erbfolge</b>                                         | 74   |
| <b>§ 1. Begriff und Arten der Verfügung von Todes wegen</b>                         | 74   |
| <b>§ 2. Das Testament</b>                                                           | 76   |
| A. Begriff und Arten                                                                | 76   |
| B. Wirksamkeitsvoraussetzungen                                                      | 82   |
| I. Persönliche Errichtung                                                           | 82   |
| II. Testierwille                                                                    | 86   |
| III. Testierfähigkeit                                                               | 88   |
| IV. Gesetzes- und Sittenwidrigkeit gemäß §§ 134, 138                                | 82   |
| V. Formvorschriften für die ordentlichen Testamente                                 | 99   |
| VI. Besonderheiten der außerordentlichen Testamente                                 | 107  |
| VII. Wiederholung und Vertiefung                                                    | 109  |
|                                                                                     | XIII |

|                                                                        |         |
|------------------------------------------------------------------------|---------|
| C. Inhalt der Verfügungen von Todes wegen                              | 111     |
| I. Die Enterbung                                                       | 111     |
| II. Die Erbeinsetzung                                                  | 113     |
| III. Das Vermächtnis                                                   | 126     |
| IV. Die Auflage                                                        | 131     |
| V. Wiederholung und Vertiefung                                         | 133     |
| VI. Testamentsvollstreckung                                            | 134     |
| VII. Pflichtteilsentziehung und -beschränkungen                        | 142     |
| VIII. Nicht-erbrechtliche Anordnungen                                  | 153     |
| IX. Wiederholung und Vertiefung                                        | 145     |
| <br><b>§ 3. Gemeinschaftliches Testament</b>                           | <br>145 |
| A. Begriff                                                             | 146     |
| B. Die Form gemeinschaftlicher Testamente                              | 147     |
| I. Das öffentliche gemeinschaftliche Testament                         | 148     |
| II. Das eigenhändige gemeinschaftliche Testament                       | 148     |
| III. Gemeinschaftliche Nottestamente                                   | 149     |
| IV. Mischformen                                                        | 149     |
| C. Besondere Voraussetzungen des gemeinschaftlichen Testaments         | 150     |
| I. Gemeinschaftlichkeit der Erklärung                                  | 150     |
| II. Wirksame Ehe                                                       | 153     |
| D. Arten gemeinschaftlicher Testamente                                 | 155     |
| I. Das gleichzeitige Testament (äußerlich gemeinsames Testament)       | 155     |
| II. Das gegenseitige Testament (reziprokes Testament)                  | 155     |
| III. Das wechselbezügliche (korrespektive) gemeinschaftliche Testament | 156     |
| E. Der Inhalt gemeinschaftlicher Testamente                            | 156     |
| I. Allgemeines                                                         | 156     |
| II. Wechselbezügliche Verfügungen der Ehegatten                        | 156     |
| F. Praktisch wichtige Gestaltungen beim gemeinschaftlichen Testament   | 163     |
| I. Gegenseitige Erbeinsetzung                                          | 163     |
| II. Einbeziehung Dritter                                               | 163     |
| III. Wiederverheirathungsklauseln                                      | 165     |
| IV. Pflichtteilklauseln (Schutz vor Pflichtteilsansprüchen)            | 167     |
| G. Prozessuale Aspekte                                                 | 170     |

|                                                                                |     |
|--------------------------------------------------------------------------------|-----|
| H. Wiederholung und Vertiefung                                                 | 171 |
| I. Muster                                                                      | 172 |
| <b>§ 4. Der Erbvertrag</b>                                                     | 173 |
| A. Begriff                                                                     | 174 |
| B. Arten des Erbvertrages                                                      | 175 |
| I. Einseitige und mehrseitige Erbverträge                                      | 175 |
| II. Entgeltliche und unentgeltliche Erbverträge                                | 176 |
| C. Die Errichtung eines Erbvertrages: Besondere Wirksamkeitsvoraussetzungen    | 177 |
| I. Persönliche Errichtung                                                      | 177 |
| II. Unbeschränkte Geschäftsfähigkeit                                           | 177 |
| III. Form                                                                      | 179 |
| IV. Amtliche Verwahrung                                                        | 179 |
| D. Der Inhalt von Erbverträgen                                                 | 180 |
| I. Allgemeines                                                                 | 180 |
| II. Vertragsmäßige Verfügungen                                                 | 181 |
| III. Einseitige Verfügungen                                                    | 182 |
| IV. Häufige Gestaltungen beim Erbvertrag                                       | 183 |
| E. Die Bindungswirkung des Erbvertrages                                        | 185 |
| I. Rechtsgrund der Bindungswirkung                                             | 185 |
| II. Rechtsfolgen der erbvertraglichen Bindung                                  | 186 |
| F. Beseitigung der Bindungswirkung                                             | 194 |
| G. Wiederholung und Vertiefung                                                 | 194 |
| H. Muster                                                                      | 195 |
| <b>§ 5. Die Auslegung einer Verfügung von Todes wegen</b>                      | 198 |
| A. Die Testamentsauslegung                                                     | 198 |
| I. Auslegungsgründe                                                            | 198 |
| II. Feststellung der äußeren Formwirksamkeit                                   | 199 |
| III. Ziel der Auslegung                                                        | 199 |
| IV. Erläuternde Testamentsauslegung                                            | 202 |
| V. Ergänzende Auslegung                                                        | 205 |
| VI. Wiederholung und Vertiefung                                                | 211 |
| VII. Der Grundsatz der wohlwollenden Auslegung, § 2084 (benigna interpretatio) | 212 |
| VIII. Umdeutung                                                                | 214 |
| IX. Weitere gesetzliche Auslegungs- und Ergänzungsregeln                       | 215 |
| X. Erbrechtliche Auslegungsverträge                                            | 217 |
|                                                                                | XV  |

|                                                           |            |
|-----------------------------------------------------------|------------|
| B. Auslegung eines Erbvertrags                            | 218        |
| I. Vertragsmäßige Verfügungen                             | 218        |
| II. Einseitige Verfügungen                                | 219        |
| III. Gesetzliche Auslegungsregeln                         | 219        |
| C. Auslegung von Ehegattentestamenten                     | 219        |
| I. Wechselbezügliche Verfügungen, § 2270 Abs. 1           | 219        |
| II. Nicht wechselbezügliche Verfügungen                   | 220        |
| III. Gesetzliche Auslegungsregeln                         | 220        |
| <b>§ 6. Die Aufhebung einer Verfügung von Todes wegen</b> | <b>220</b> |
| A. Aufhebung testamentarischer Verfügungen                | 221        |
| I. Der Widerruf eines Testaments                          | 221        |
| II. Anfechtung letztwilliger Verfügungen                  | 230        |
| III. Wiederholung und Vertiefung                          | 248        |
| B. Besonderheiten der Aufhebung von Ehegattentestamenten  | 248        |
| I. Grundsätzliches                                        | 248        |
| II. Nicht wechselbezügliche Verfügungen                   | 249        |
| III. Wechselbezügliche Verfügungen                        | 249        |
| C. Besonderheiten der Aufhebung von Erbverträgen          | 252        |
| I. Grundsätzliches                                        | 252        |
| II. Einseitige Verfügungen                                | 252        |
| III. Vertragsmäßige Verfügungen                           | 253        |
| <b>4. Kapitel. Annahme und Ausschlagung der Erbschaft</b> | <b>260</b> |
| <b>§ 1. Der Erbanfall</b>                                 | <b>260</b> |
| <b>§ 2. Erbunwürdigkeit</b>                               | <b>261</b> |
| A. Begriff                                                | 261        |
| B. Erbunwürdigkeitsgründe                                 | 261        |
| C. Ausschluss der Erbunwürdigkeit                         | 263        |
| D. Erbunwürdigkeitsklage                                  | 265        |
| E. Folgen einer erfolgreichen Anfechtungsklage            | 265        |
| F. Vermächtnis- und Pflichtteilsunwürdigkeit              | 266        |
| <b>§ 3. Der Erbverzicht</b>                               | <b>266</b> |
| A. Gegenstand des Verzichts und Abschluss des Vertrages   | 266        |
| B. Aufhebung des Verzichts                                | 268        |
| C. Abfindungsvertrag                                      | 269        |

|                                                                         |         |
|-------------------------------------------------------------------------|---------|
| <b>§ 4. Annahme und Ausschlagung der Erbschaft</b>                      | 270     |
| A. Allgemeines                                                          | 270     |
| B. Ausschlagungsrecht                                                   | 271     |
| C. Ausschlagungsform und -frist                                         | 272     |
| D. Umfang der Annahme bzw. Ausschlagung                                 | 274     |
| E. Anfechtung von Annahme oder Ausschlagung                             | 275     |
| <b>§ 5. Wiederholung und Vertiefung</b>                                 | 279     |
| <br><b>5. Kapitel. Die Rechtsstellung des Erben</b>                     | <br>280 |
| <b>§ 1. Der vorläufige Erbe</b>                                         | 280     |
| A. Einleitung                                                           | 280     |
| B. Vornahme von Verpflichtungsgeschäften                                | 280     |
| C. Vornahme von Verfügungen                                             | 281     |
| I. Allgemeines                                                          | 281     |
| II. Probleme des gutgläubigen Erwerbs                                   | 282     |
| III. Erfüllung einer Nachlassverbindlichkeit                            | 283     |
| D. Vornahme einseitiger Rechtsgeschäfte gegenüber dem vorläufigen Erben | 283     |
| E. Haftung des vorläufigen Erben vor Erbschaftsannahme                  | 283     |
| F. Wiederholung und Vertiefung                                          | 285     |
| <b>§ 2. Der Erbschaftsanspruch, §§ 2018ff.</b>                          | 286     |
| A. Einleitung                                                           | 286     |
| B. Die Anspruchsvoraussetzungen des § 2018                              | 287     |
| I. Der Erbe als Anspruchsteller                                         | 287     |
| II. Erbschaftsbesitzer als Anspruchsgegner                              | 287     |
| III. „etwas aus der Erbschaft erlangt“                                  | 288     |
| IV. Konkurrierende Ansprüche des Erben                                  | 290     |
| <b>§ 3. Der Surrogationsgrundsatz, § 2019 Abs. 1</b>                    | 290     |
| A. Allgemeines                                                          | 290     |
| B. Die Voraussetzungen der Norm                                         | 291     |
| I. Ersatzgegenstand („was“)                                             | 291     |
| II. Rechtsgeschäftlicher Erwerb                                         | 292     |
| III. „mit Mitteln der Erbschaft“                                        | 294     |

|                                                                                 |     |
|---------------------------------------------------------------------------------|-----|
| <b>§ 4. Die Herausgabe der Nutzungen gemäß § 2020</b>                           | 295 |
| <b>§ 5. Sekundäransprüche des Erben</b>                                         | 296 |
| A. Die Haftung des gutgläubigen Erbschaftsbesitzers, § 2021                     | 296 |
| B. Die Haftung des verklagten Erbschaftsbesitzers, § 2023                       | 297 |
| C. Die Haftung des bösgläubigen Erbschaftsbesitzers, § 2024                     | 298 |
| D. Die Haftung des deliktischen Erbschaftsbesitzers, § 2025                     | 299 |
| <b>§ 6. Die Verwendungsersatzansprüche des Erbschaftsbesitzers, §§ 2022 ff.</b> | 300 |
| A. Gutgläubiger, unverklagter Erbschaftsbesitzer                                | 300 |
| B. Verklagter, bösgläubiger bzw. deliktischer Erbschaftsbesitzer                | 301 |
| C. Wiederholung und Vertiefung                                                  | 303 |
| <b>§ 7. Erbenhaftung</b>                                                        | 304 |
| A. Einleitung                                                                   | 304 |
| B. Grundsätze der Erbenhaftung                                                  | 304 |
| C. Arten der Nachlassverbindlichkeiten                                          | 305 |
| D. Beschränkung der Haftung auf den Nachlass                                    | 306 |
| I. Vorläufige Haftungsbeschränkung durch Dreimonats-<br>sowie Aufgebotseinrede  | 306 |
| II. Endgültige Haftungsbeschränkung                                             | 307 |
| E. Inventarerrichtung                                                           | 316 |
| <b>§ 8. Der Erbschein</b>                                                       | 317 |
| A. Inhalt und Arten des Erbscheins                                              | 317 |
| B. Erteilungsverfahren                                                          | 320 |
| I. Zuständigkeit                                                                | 320 |
| II. Antrag                                                                      | 320 |
| III. Erteilung durch das Nachlassgericht                                        | 321 |
| C. Rechtsbehelfe gegen die Entscheidung des Nachlassgerichts                    | 323 |
| I. Zurückweisung des Antrages                                                   | 323 |
| II. Einziehung des Erbscheins                                                   | 323 |
| D. Verhältnis zum Zivilprozess                                                  | 324 |
| E. Wirkungen                                                                    | 325 |
| I. Die Vermutung der Richtigkeit, § 2365                                        | 325 |
| II. Der öffentliche Glaube, §§ 2366 f.                                          | 326 |
| III. Widersprüchliche Erbscheine                                                | 329 |



|                                                                         |         |
|-------------------------------------------------------------------------|---------|
| F. Das Testamentsvollstreckerzeugnis, § 2368                            | 329     |
| G. Wiederholung und Vertiefung                                          | 332     |
| H. Muster                                                               | 333     |
| I. Erbschein                                                            | 333     |
| II. Testamentsvollstreckerzeugnis                                       | 333     |
| <b>§ 9. Die Erbengemeinschaft</b>                                       | 334     |
| A. Einführung                                                           | 334     |
| B. Rechtsnatur der Miterbengemeinschaft und Rechtsstellung der Miterben | 335     |
| I. Der Nachlass als Sondervermögen                                      | 336     |
| II. Die Rechtsstellung der Miterben                                     | 337     |
| C. Die Verwaltung des Nachlasses                                        | 341     |
| I. Das Innenverhältnis                                                  | 341     |
| II. Das Außenverhältnis                                                 | 343     |
| D. Die Auseinandersetzung der Miterbengemeinschaft                      | 347     |
| I. Der Anspruch auf Auseinandersetzung und seine Durchsetzung           | 347     |
| II. Die Durchführung der Auseinandersetzung                             | 349     |
| III. Ausgleichspflichten                                                | 350     |
| E. Die Haftung der Miterben                                             | 355     |
| I. Haftungslage vor Nachlassteilung                                     | 356     |
| II. Haftung nach Nachlassteilung                                        | 357     |
| F. Wiederholung und Vertiefung                                          | 359     |
| <br><b>6. Kapitel. Das Pflichtteilsrecht</b>                            | <br>360 |
| <b>§ 1. Bedeutung</b>                                                   | 360     |
| <b>§ 2. Der pflichtteilsberechtigte Personenkreis</b>                   | 362     |
| <b>§ 3. Der volle Pflichtteilsanspruch gem. § 2303</b>                  | 363     |
| A. Ausschluss von der gesetzlichen Erbfolge                             | 363     |
| B. Ausschluss durch Verfügung von Todes wegen                           | 363     |
| C. Inhalt, Entstehung und Übertragbarkeit des Pflichtteilsanspruchs     | 364     |
| D. Schuldner des Pflichtteilsanspruchs                                  | 365     |
| E. Berechnung des Pflichtteils im Allgemeinen                           | 365     |
|                                                                         | XIX     |

|                                                                                      |     |
|--------------------------------------------------------------------------------------|-----|
| I. Ermittlung des konkreten Pflichtteilsbetrages                                     | 366 |
| II. Anrechnung und Ausgleichung                                                      | 367 |
| F. Berechnung des Pflichtteils im Falle einer Zugewinngemeinschaft                   | 372 |
| I. Der Pflichtteil des enterbten Ehegatten                                           | 372 |
| II. Pflichtteil der Abkömmlinge neben dem Ehegatten                                  | 374 |
| <b>§ 4. Der Pflichtteilsrestanspruch, § 2305</b>                                     | 376 |
| A. Voraussetzungen                                                                   | 376 |
| I. Vergleich des hinterlassenen Erbteils mit der Hälfte des gesetzlichen Erbteils    | 376 |
| II. Vergleichsmaßstab im Falle der Zugewinngemeinschaft                              | 377 |
| B. Rechtsfolge                                                                       | 377 |
| C. Wirkung der Ausschlagung                                                          | 378 |
| <b>§ 5. Der Pflichtteil bei Zuwendung eines belasteten Erbteils</b>                  | 378 |
| <b>§ 6. Der Pflichtteil bei Zuwendung eines Vermächtnisses, § 2307</b>               | 380 |
| <b>§ 7. Der Pflichtteilsergänzungsanspruch bei Enterbung, § 2325</b>                 | 381 |
| A. Voraussetzungen                                                                   | 381 |
| I. Schenkung an einen Dritten                                                        | 381 |
| II. Innerhalb der letzten 10 Jahre, § 2325 Abs. 3                                    | 382 |
| III. Keine Anstandsschenkung, § 2330                                                 | 383 |
| IV. Anspruchsberechtigung                                                            | 384 |
| B. Rechtsfolge                                                                       | 385 |
| I. Inhalt des Ergänzungsanspruchs und Anspruchsgegner                                | 385 |
| II. Berechnung                                                                       | 385 |
| III. Berücksichtigung eines dem Pflichtteilsberechtigten gemachten Geschenks, § 2327 | 386 |
| IV. Verweigerungsrecht des selbst pflichtteilsberechtigten Erben, § 2328             | 387 |
| <b>§ 8. Der Pflichtteilsergänzungsanspruch eines Erben, § 2326</b>                   | 387 |
| <b>§ 9. Der Pflichtteilsergänzungsanspruch gegen den Beschenkten, § 2329</b>         | 388 |

|                                                                                |     |
|--------------------------------------------------------------------------------|-----|
| <b>§ 10. Der Auskunfts- und Wertermittlungsanspruch, § 2314</b>                | 389 |
| A. Der Auskunftsanspruch gem. § 2314 Abs. 1 S. 1                               | 389 |
| B. Der Wertermittlungsanspruch gem. § 2314 Abs. 1 S. 2                         | 390 |
| <b>§ 11. Stundung des Pflichtteilsanspruchs, § 2331 a</b>                      | 391 |
| <b>§ 12. Verjährung des Pflichtteilsanspruchs, § 2332</b>                      | 392 |
| <b>§ 13. Ausschluss des Pflichtteilsrechts</b>                                 | 394 |
| A. Verlust des gesetzlichen Erbrechts                                          | 394 |
| B. Pflichtteilsverzicht, § 2346 Abs. 2                                         | 394 |
| C. Die Pflichtteilsentziehung, §§ 2333 ff.                                     | 395 |
| I. Entziehung des Pflichtteils eines Abkömmlings, § 2333                       | 395 |
| II. Entziehung des Pflichtteils der Eltern, § 2334, und des Ehegatten, § 2335  | 396 |
| III. Verzeihung, § 2337 S. 1                                                   | 396 |
| IV. Entziehung durch letztwillige Verfügung, § 2336 Abs. 1, 2                  | 397 |
| D. Pflichtteilsbeschränkung in guter Absicht, § 2338                           | 397 |
| <b>§ 14. Die Verteilung der Pflichtteilslast im Innenverhältnis</b>            | 397 |
| A. Die Haftung der Miterben untereinander                                      | 398 |
| B. Verhältnis der Erben, Vermächtnisnehmer und Auflagenbegünstigten zueinander | 398 |
| <b>§ 15. Wiederholung und Vertiefung</b>                                       | 400 |
| <b>7. Kapitel. Sonderprobleme</b>                                              | 401 |
| <b>§ 1. Rechtsgeschäfte unter Lebenden auf den Todesfall</b>                   | 401 |
| A. Einleitung                                                                  | 401 |
| I. Begriff                                                                     | 401 |
| II. Die Motive derartiger Rechtsgeschäfte                                      | 402 |
| III. Abgrenzung                                                                | 403 |
| IV. Auswirkung der Einordnung                                                  | 404 |
|                                                                                | XXI |

|                                                                                                        |         |
|--------------------------------------------------------------------------------------------------------|---------|
| B. Begriff und Voraussetzungen der Schenkung von Todes wegen, § 2301 Abs. 1                            | 408     |
| I. Schenkungsversprechen                                                                               | 408     |
| II. Befristung durch den Tod des Schenkers                                                             | 410     |
| III. Bedingt durch das Überleben des Beschenkten                                                       | 412     |
| IV. Formvorschriften und Rechtsfolgen eines nicht vollzogenen Schenkungsversprechens auf den Todesfall | 413     |
| V. Der lebzeitige Vollzug                                                                              | 415     |
| VI. Rechtsfolgen einer vollzogenen Schenkung auf den Todesfall                                         | 425     |
| C. Vertrag zugunsten Dritter auf den Todesfall, §§ 328, 331                                            | 425     |
| I. Deckungsverhältnis                                                                                  | 426     |
| II. Valutaverhältnis                                                                                   | 427     |
| III. Rechtsfolgen eines wirksamen Vertrags zugunsten Dritter auf den Todesfall                         | 432     |
| IV. Besonderheiten bei der Lebensversicherung                                                          | 432     |
| D. Wiederholung und Vertiefung                                                                         | 435     |
| <br><b>§ 2. Rechtsnachfolge in Unternehmen und Unternehmensbeteiligungen</b>                           | <br>436 |
| A. Einleitung                                                                                          | 436     |
| B. Einzelkaufmännisches Handelsgeschäft                                                                | 437     |
| I. Das Handelsgeschäft als Teil der Erbschaft                                                          | 437     |
| II. Haftung des Unternehmens-Erben                                                                     | 437     |
| III. Form der Fortführung                                                                              | 438     |
| IV. Sonderfall: Nachfolge eines minderjährigen Erben                                                   | 439     |
| C. Rechtsnachfolge in Gesellschaftsbeteiligungen                                                       | 439     |
| II. Kapitalgesellschaftsbeteiligung                                                                    | 450     |
| D. Wiederholung und Vertiefung                                                                         | 450     |
| <br><b>§ 3. Der Erbschafts Kauf</b>                                                                    | <br>452 |
| A. Gegenstand des Erbschaftskaufs                                                                      | 452     |
| B. Das Verhältnis zwischen Erbschaftskäufer und -verkäufer                                             | 453     |
| I. Umfang der Verpflichtung                                                                            | 453     |
| II. Besonderheiten gegenüber dem allgemeinen Kaufrecht                                                 | 454     |
| III. Das Innenverhältnis                                                                               | 455     |
| IV. Formerfordernisse                                                                                  | 455     |
| C. Das Verhältnis zu Nachlassgläubigern                                                                | 456     |

|                                |     |
|--------------------------------|-----|
| D. Die Erfüllung               | 456 |
| E. Wiederholung und Vertiefung | 458 |
| <b>Anhang</b>                  | 459 |
| <b>Literaturverzeichnis</b>    | 485 |
| <b>Sachverzeichnis</b>         | 487 |
